# Supplementary material for: Cation binding of Li(i), Na(i) and Zn(ii) to cobalt and iron sulphide clusters – electronic structure study
Source: Royal Society of Chemistry journal article supplement (doi:10.1039/d2cp02415b), 2022-01-01
Supplement: d2cp02415b1.pdf [file d2cp02415b1.pdf]

Method validation. A number of density functional were tested on the diatomic molecules FeS, CoS and S<sub>2</sub>, Table 1S. Experimental data are available for FeS and S<sub>2</sub>, while for CoS only the bond length and the ground electron state were reported. B3LYP provides accurate results for the dissociation energies and electron affinities of FeS and S<sub>2</sub>; vibrational frequencies are also predicted with minor deviation, bond lengths are slightly overestimated, by 0.6% for FeS and CoS and by 1% for S<sub>2</sub>. More accurate FeS bond length is provided by the B3PW91 functional, but the dissociation energy is calculated too high, while electron affinity is too low. MO6 overestimates bond lengths of FeS and S<sub>2</sub>, the dissociation energies as well, while providing more accurate CoS bond length; electron affinities are either overestimated (FeS) or underestimated (S<sub>2</sub>); in general the MO6 calculated binding energies and electron affinities do not match well the experimental data. The TPSS and BLYP calculated electron affinities are similar and underestimate experimental measurements, for CoS they provide higher values than all other density functionals.

Table 1S. Bond Length, Dissociation Energy (D<sub>zpe</sub>) Corrected for Zero-Point Energy, Vibrational Frequency ( $\omega$ ) and Electron Affinity (EA) for FeS, CoS, S<sub>2</sub>, as Calculated by DFT

| Cluster/Method        | R <sub>M-O</sub> , Å | D <sub>zpe</sub> , kJ mol <sup>-1</sup> | $\omega$ , cm <sup>-1</sup> | EA, eV                     |
|-----------------------|----------------------|-----------------------------------------|-----------------------------|----------------------------|
| FeS; <sup>5</sup> Δ   |                      |                                         |                             |                            |
| B3LYP <sup>(1)</sup>  | 2.029                | 327.7                                   | 515.6                       | 1.717                      |
| B3PW91 <sup>(2)</sup> | 2.014                | 360.5                                   | 528.2                       | 1.578                      |
| BLYP <sup>(3)</sup>   | 2.031                | 378.5                                   | 499.0                       | 1.541                      |
| TPSS <sup>(4)</sup>   | 2.009                | 387.7                                   | 523.3                       | 1.433                      |
| M06 <sup>(5)</sup>    | 2.033                | 393.2                                   | 530.1                       | 1.835                      |
| Exp.                  | 2.017 <sup>a</sup>   | 328.9±14.6 <sup>b</sup>                 | 523.2 <sup>c</sup>          | 1.725 ± 0.010 <sup>d</sup> |
| CoS; <sup>4</sup> Δ   |                      |                                         |                             |                            |
| B3LYP                 | 1.989                | 323.4                                   | 520                         | 1.293                      |

|                     |                    |                    |                    |                            |
|---------------------|--------------------|--------------------|--------------------|----------------------------|
| B3PW91              | 1.977              | 326.6              | 533                | 1.273                      |
| BLYP                | 1.999              | 322.1              | 497                | 1.810                      |
| TPSS                | 1.982              | 376.3              | 522                | 1.780                      |
| M06                 | 1.976              | 345.9              | 548                | 1.597                      |
| Exp.                | 1.978 <sup>e</sup> |                    |                    |                            |
| $S_2; ^3\Sigma_g^-$ |                    |                    |                    |                            |
| B3LYP               | 1.909              | 423.2              | 712.4              | 1.682                      |
| B3PW91              | 1.897              | 435.7              | 735.9              | 1.666                      |
| BLYP                | 1.936              | 442.0              | 663.7              | 1.516                      |
| TPSS                | 1.913              | 447.6              | 703.8              | 1.568                      |
| M06                 | 1.899              | 438.4              | 739.7              | 1.532                      |
| Exp.                | 1.889 <sup>b</sup> | 421.6 <sup>b</sup> | 725.7 <sup>b</sup> | 1.670 ± 0.015 <sup>f</sup> |

Experimental data are from references in the paper: <sup>a</sup> – ref. 43; <sup>b</sup> – ref. 67; <sup>c</sup> – ref. 68; <sup>d</sup> – ref. 13; <sup>e</sup> – ref. 42; <sup>f</sup> – ref. 69

- (1) A. D. Becke, “Density-functional thermochemistry. III. The role of exact exchange,” *J. Chem. Phys.*, **98** (1993) 5648-52; C. Lee, W. Yang, R. G. Parr, *Phys. Rev. B*, **37**, 785 (1988); B. Miehlich, A. Savin, H. Stoll, H. Preuss, *Chem. Phys. Lett.*, **157**, 200 (1989)
- (2) J. P. Perdew, J. A. Chevary, S. H. Vosko, K. A. Jackson, M. R. Pederson, D. J. Singh, and C. Fiolhais, “Atoms, molecules, solids, and surfaces: Applications of the generalized gradient approximation for exchange and correlation,” *Phys. Rev. B*, **46** (1992) 6671-87.
- (3) A. D. Becke, “Density-functional exchange-energy approximation with correct asymptotic-behavior,” *Phys. Rev. A*, **38** (1988) 3098-100.
- (4) J. M. Tao, J. P. Perdew, V. N. Staroverov, and G. E. Scuseria, “Climbing the density functional ladder: Nonempirical meta-generalized gradient approximation designed for molecules and solids,” *Phys. Rev. Lett.*, **91** (2003) 146401. Gaussian Keyword TPSSTPSS.
- (5) Y. Zhao and D. G. Truhlar, “The M06 suite of density functionals for main group thermochemistry, thermochemical kinetics, noncovalent interactions, excited states, and transition elements” *Theor. Chem. Acc.*, **120** (2008) 215-41.

**Table 2S.** Natural charges (q, e) and natural orbital population for sulfides bonded to cations.

| Cluster                                                                          | q <sub>M</sub> | q <sub>S</sub> | q cat/lig <sup>a</sup> | M 3d | M 4s | M 4p | Cation/Ligand          |
|----------------------------------------------------------------------------------|----------------|----------------|------------------------|------|------|------|------------------------|
| CoS <sub>2</sub>                                                                 | 0.54           | -0.27          |                        | 7.62 | 0.49 | 0.33 |                        |
| Co(S <sub>2</sub> )                                                              | 0.22           | -0.11          |                        | 7.90 | 0.47 | 0.41 |                        |
| Co <sub>2</sub> S <sub>2</sub> , afm <sup>b</sup>                                | 0.61           | -0.61          |                        | 7.71 | 0.37 | 0.26 |                        |
| Co <sub>2</sub> S <sub>2</sub> npl <sup>c</sup> , <sup>3</sup> A <sub>2</sub>    | 0.69           | -0.69          |                        | 7.72 | 0.35 | 0.23 |                        |
| Co <sub>2</sub> (S <sub>2</sub> ) npl <sup>c</sup> , <sup>7</sup> A <sub>1</sub> | 0.43           | -0.43          |                        | 7.84 | 0.51 | 0.20 |                        |
| FeS <sub>2</sub>                                                                 | 0.52           | -0.26          |                        | 6.58 | 0.41 | 0.35 |                        |
| Fe(S <sub>2</sub> )                                                              | 0.50           | -0.25          |                        | 6.85 | 0.40 | 0.22 |                        |
| Fe <sub>2</sub> S <sub>2</sub> ; afm <sup>b</sup>                                | 0.66           | -0.66          |                        | 6.79 | 0.43 | 0.31 |                        |
| Fe <sub>2</sub> (S <sub>2</sub> ) <sup>5</sup> A <sub>1</sub>                    | 0.26           | -0.26          |                        | 6.93 | 0.59 | 0.21 |                        |
| FeSSFe, C <sub>2h</sub> <sup>5</sup> A <sub>u</sub>                              | 0.31           | -0.31          |                        | 6.86 | 0.75 | 0.07 |                        |
| ClCo(S <sub>2</sub> )                                                            | 0.80           | -0.12          | -0.55                  | 7.68 | 0.45 | 0.04 | 3p(5.58)               |
| ClCoS <sub>2</sub>                                                               | 0.55           | -0.09          | -0.36                  | 7.86 | 0.49 | 0.06 | 3p(5.39)               |
| ClCo(S <sub>2</sub> )-Li <sup>+</sup>                                            | 0.98           | -0.62          | 0.90 Li                | 7.49 | 0.45 | 0.05 | 2s(0.05) Li            |
| (CO)Co(S <sub>2</sub> )                                                          | 0.78           | -0.33          | 0.32 C/<br>-0.43 O     | 7.75 | 0.38 | 0.07 | 2p(2.22)C<br>2p(4.70)O |
| (CO)CoS <sub>2</sub>                                                             | 0.69           | -0.39          | 0.50 C/<br>-0.40 O     | 7.82 | 0.40 | 0.07 | 2p(2.16)C<br>2p(4.67)O |
| Co <sub>2</sub> S <sub>2</sub> -Li <sup>+</sup>                                  | 0.79           | -0.76          | 0.94                   | 5.53 | 0.42 | 0.28 | 2s(0.04)               |
| Co <sub>2</sub> S <sub>2</sub> -Li <sup>+</sup> , e <sup>-</sup>                 | 0.44           | -0.89          | 0.90                   | 7.74 | 0.44 | 0.36 | 2s(0.07)               |
| Co <sub>2</sub> S <sub>2</sub> -Na <sup>+</sup>                                  | 0.60           | -0.53          | 0.94                   | 7.65 | 0.61 | 0.14 | 3s(0.06)               |
| Co <sub>2</sub> S <sub>2</sub> -Na <sup>+</sup> , e <sup>-</sup>                 | 0.44           | -0.90          | 0.92                   | 7.73 | 0.44 | 0.37 | 3s(0.07)               |

|                                                                  |      |       |      |      |      |      |                         |
|------------------------------------------------------------------|------|-------|------|------|------|------|-------------------------|
| Co(S <sub>2</sub> )-Li <sup>+</sup>                              | 0.91 | -0.43 | 0.94 | 7.67 | 0.25 | 0.16 | 2s(0.03)                |
| CoS <sub>2</sub> -Li <sup>+</sup>                                | 0.93 | -0.43 | 0.93 | 7.67 | 0.34 | 0.05 | 2s(0.04)                |
| CoS <sub>2</sub> -Li <sup>+</sup> ,e <sup>-</sup>                | 0.54 | -0.72 | 0.90 | 7.59 | 0.42 | 0.42 | 2s(0.06)                |
| Co(S <sub>2</sub> )-Li <sup>+</sup> ,e <sup>-</sup>              | 0.30 | -0.52 | 0.75 | 7.38 | 0.99 | 0.35 | 2p(0.17)Li              |
| Co(S <sub>2</sub> )-Na <sup>+</sup>                              | 0.86 | -0.42 | 0.97 | 7.71 | 0.25 | 0.16 | 3s(0.02)                |
| Co(S <sub>2</sub> )-Na <sup>+</sup> ,e <sup>-</sup>              | 0.34 | -0.59 | 0.86 | 7.38 | 0.95 | 0.39 | 3s(0.12)                |
| CoS <sub>2</sub> -Zn <sup>2+</sup>                               | 1.00 | -0.15 | 1.29 | 7.50 | 0.28 | 0.19 | 4s(0.52)<br>4p(0.20) Zn |
| Co(S <sub>2</sub> )-Zn <sup>2+</sup>                             | 1.20 | -0.27 | 1.35 | 7.52 | 0.18 | 0.10 | 4s(0.46)<br>4p(0.19) Zn |
| CoS <sub>2</sub> -Zn <sup>2+</sup> ,2e <sup>-</sup>              | 0.61 | -0.75 | 0.89 | 7.70 | 0.34 | 0.32 | 4s(0.67)<br>4p(0.44) Zn |
| Co(S <sub>2</sub> )-Zn <sup>2+</sup> ,2e <sup>-</sup>            | 0.30 | -0.26 | 0.28 | 7.86 | 0.66 | 0.17 | 4s(1.50)<br>4p(0.21) Zn |
| <hr/>                                                            |      |       |      |      |      |      |                         |
| Co <sub>2</sub> S <sub>2</sub> -Zn <sup>2+</sup>                 | 1.03 | -0.60 | 1.15 | 7.42 | 0.33 | 0.20 | 4s(0.58)<br>4p(0.27) Zn |
| Co <sub>2</sub> S <sub>2</sub> -Zn <sup>2+</sup> ,e <sup>-</sup> | 0.50 | -0.74 | 0.50 | 7.72 | 0.42 | 0.34 | 4s(1.21)<br>4p(0.29) Zn |
| <hr/>                                                            |      |       |      |      |      |      |                         |
| Co <sub>4</sub> S <sub>4</sub> -Li <sup>+</sup>                  | 0.23 | -0.22 | 0.94 | 8.15 | 0.35 | 0.44 | 2s(0.05)Li              |
| Co <sub>4</sub> S <sub>4</sub> -Li <sup>+</sup> ,e <sup>-</sup>  | 0.49 | -0.79 | 0.91 | 7.58 | 0.42 | 0.40 | 2s(0.06)Li              |
| <hr/>                                                            |      |       |      |      |      |      |                         |
| FeS <sub>2</sub> -Li <sup>+</sup>                                | 0.72 | -0.33 | 0.94 | 6.55 | 0.36 | 0.34 | 2s(0.04)                |
| Fe(S <sub>2</sub> )-Li <sup>+</sup>                              | 0.99 | -0.42 | 0.85 | 6.56 | 0.27 | 0.17 | 2p(0.11)Li              |
| FeS <sub>2</sub> -Li <sup>+</sup> ,e <sup>-</sup>                | 0.41 | -0.65 | 0.88 | 6.96 | 0.40 | 0.21 | 2s(0.07)                |
| Fe(S <sub>2</sub> )-Li <sup>+</sup> ,e <sup>-</sup>              | 0.33 | -0.53 | 0.74 | 6.32 | 1.00 | 0.34 | 2p(0.18)Li              |
| Fe(S <sub>2</sub> )-Na <sup>+</sup> ,e <sup>-</sup>              | 0.26 | -0.57 | 0.89 | 6.35 | 0.99 | 0.38 | 3s(0.10)                |

|                                                                  |      |       |                    |      |      |      |                         |
|------------------------------------------------------------------|------|-------|--------------------|------|------|------|-------------------------|
| (CO)Fe(S <sub>2</sub> )                                          | 0.71 | -0.31 | 0.34 C/<br>-0.43 O | 6.82 | 0.39 | 0.04 | 2p(2.20)C<br>2p(4.69)O  |
| (CO)FeS <sub>2</sub>                                             | 0.72 | -0.38 | 0.42 C/<br>-0.39 O | 6.75 | 0.43 | 0.04 | 2p(2.09)C<br>2p(4.65)O  |
| ClFeS <sub>2</sub>                                               | 0.79 | -0.19 | -0.41              | 6.67 | 0.43 | 0.07 | 3p(5.44)                |
| ClFe(S <sub>2</sub> )                                            | 0.85 | -0.14 | -0.57              | 6.58 | 0.49 | 0.04 | 3p(5.60)                |
| ClFe(S <sub>2</sub> )-Li <sup>+</sup>                            | 1.03 | -0.65 | 0.90 Li            | 6.48 | 0.41 | 0.05 | 2s(0.06) Li             |
| Fe <sub>2</sub> S <sub>2</sub> -Li <sup>+</sup>                  | 0.70 | -0.67 | 0.94               | 6.72 | 0.33 | 0.23 | 2s(0.04)                |
| Fe <sub>2</sub> S <sub>2</sub> -Li <sup>+</sup> ,e <sup>-</sup>  | 0.43 | -0.88 | 0.90               | 6.74 | 0.45 | 0.35 | 2s(0.06)                |
| Fe <sub>2</sub> S <sub>2</sub> -Na <sup>+</sup>                  | 0.68 | -0.66 | 0.96               | 6.72 | 0.33 | 0.24 | 2s(0.03)                |
| Fe <sub>2</sub> S <sub>2</sub> -Na <sup>+</sup> ,e <sup>-</sup>  | 0.30 | -0.76 | 0.91               | 6.95 | 0.40 | 0.32 | 3s(0.08)                |
| FeS <sub>2</sub> -Zn <sup>2+</sup>                               | 0.97 | -0.16 | 1.35               | 6.41 | 0.23 | 0.18 | 4s(0.50)<br>4p(0.21) Zn |
| Fe(S <sub>2</sub> )-Zn <sup>2+</sup>                             | 1.18 | -0.25 | 1.32               | 6.39 | 0.21 | 0.13 | 4s(0.48)<br>4p(0.18) Zn |
| FeS <sub>2</sub> -Zn <sup>2+</sup> ,2e <sup>-</sup>              | 0.69 | -0.73 | 0.77               | 6.55 | 0.33 | 0.31 | 4s(0.61)<br>4p(0.25) Zn |
| Fe(S <sub>2</sub> )-Zn <sup>2+</sup> ,2e <sup>-</sup>            | 0.46 | -0.42 | 0.40               | 6.49 | 0.82 | 0.22 | 4s(1.28)<br>4p(0.32) Zn |
| Fe <sub>2</sub> S <sub>2</sub> -Zn <sup>2+</sup>                 | 0.92 | -0.52 | 1.16               | 6.65 | 0.29 | 0.19 | 4s(0.59)<br>4p(0.24) Zn |
| Fe <sub>2</sub> S <sub>2</sub> -Zn <sup>2+</sup> ,e <sup>-</sup> | 0.50 | -0.75 | 0.51               | 6.75 | 0.41 | 0.31 | 4s(1.09)<br>4p(0.40) Zn |

a – cat/lig =cation or ligand; b – afm = antiferromagnetic ordering; c – npl = non-planar cluster

**Table 3S.** Bond Lengths, Bond Angles, Magnetic Moments on Atoms ( $\mu$ , Bohr Magnetons), and Energies for disulfides  $\text{XMS}_2$  and persulfides  $\text{XM}(\text{S}_2)$ , with  $\text{X}=\text{CO}, \text{Cl}^-$  and  $\text{M}=\text{Co}, \text{Fe}$

| Cluster Model           | State                       | $R_{\text{M-S}}$ Å | $R_{\text{S-S}}$ Å | $\angle \text{SCoS}$ , deg | $R_{\text{X-M}}$ Å | $\mu_{\text{M}}$ | $\mu_{\text{S}}$ | $\Delta E_{\text{tot}}$ , eV<br>B3LYP | $\Delta E_{\text{tot}}$ , eV<br>CCSD(T) |
|-------------------------|-----------------------------|--------------------|--------------------|----------------------------|--------------------|------------------|------------------|---------------------------------------|-----------------------------------------|
| Co(S <sub>2</sub> )     | <sup>4</sup> A <sub>1</sub> | 2.141              | 2.155              | 60.4                       |                    | 2.17             | 0.41             | 0                                     | 0                                       |
|                         | <sup>2</sup> A <sub>2</sub> | 2.149              | 2.064              | 57.4                       |                    | 1.30             | -0.15            | 0.57                                  | 0.59                                    |
| CoS <sub>2</sub>        | <sup>4</sup> B <sub>2</sub> | 1.980              |                    | 110.7                      |                    | 2.02             | 0.49             | 0.50                                  | 0.38                                    |
|                         | <sup>6</sup> A <sub>1</sub> | 2.120              |                    | 155.9                      |                    | 2.62             | 1.18             | 0.56                                  | 0.64                                    |
|                         | <sup>2</sup> A <sub>1</sub> | 1.996              |                    | 120.7                      |                    | 1.95             | -0.47            | 0.82                                  | 0.87                                    |
|                         | <sup>4</sup> Σ <sub>g</sub> | 2.103              |                    | 180.0                      |                    | 2.24             | 0.38             | 1.90                                  | 1.81                                    |
| (CO)Co(S <sub>2</sub> ) | <sup>4</sup> B <sub>1</sub> | 2.196              | 2.085              | 56.7                       | 1.888              | 2.14             | 0.40             | 0                                     | 0                                       |
| (CO)CoS <sub>2</sub>    | <sup>4</sup> A <sub>1</sub> | 2.037              |                    | 154.8                      | 1.795              | 1.49             | 0.80             | 0.96                                  | 1.33                                    |
| Cl-Co(S <sub>2</sub> )  | <sup>3</sup> B <sub>2</sub> | 2.173              | 2.024              | 55.5                       | 2.108              | 2.00             | -0.04            | 0                                     | 0                                       |
| Cl-CoS <sub>2</sub>     | <sup>3</sup> B <sub>2</sub> | 1.983              |                    | 113.6                      | 2.094              | 1.77             | 0.05             | 1.72                                  | 1.89                                    |
| Fe(S <sub>2</sub> )     | <sup>5</sup> A <sub>1</sub> | 2.166              | 2.186              | 60.6                       |                    | 3.33             | 0.33             | 0                                     | 0                                       |
|                         | <sup>3</sup> B <sub>2</sub> | 2.185              |                    | 57.2                       |                    | 2.35             | -0.17            | 0.58                                  | 0.79                                    |

|                         |                  |       |       |       |       |      |       |      |      |
|-------------------------|------------------|-------|-------|-------|-------|------|-------|------|------|
|                         | $^1\mathbf{A}_1$ | 2.095 | 2.040 | 58.3  |       | 0.00 | 0.00  | 1.98 | 1.58 |
| FeS <sub>2</sub>        | $^5\mathbf{B}_2$ | 2.015 |       | 113.5 |       | 3.34 | 0.33  | 0.13 | 0.14 |
|                         | $^3\mathbf{B}_1$ | 2.015 |       | 122.4 |       | 2.94 | -0.47 | 0.39 | 0.54 |
|                         | $^1\mathbf{A}_1$ | 1.940 |       | 116.6 |       | 0.00 | 0.00  | 1.81 | 1.21 |
| (CO)Fe(S <sub>2</sub> ) | $^5\mathbf{A}$   | 2.238 | 2.074 | 55.2  | 1.884 | 3.10 | 0.48  | 0    | 0    |
| (CO)FeS <sub>2</sub>    | $^5\mathbf{A}$   | 2.044 |       | 107.6 | 2.053 | 3.09 | 0.54  | 0.97 | 0.93 |
| Cl-Fe (S <sub>2</sub> ) | $^4\mathbf{B}_2$ | 2.239 | 2.053 | 54.5  | 2.138 | 3.27 | -0.18 | 0    | 0    |
| Cl-FeS <sub>2</sub>     | $^4\mathbf{A}_1$ | 2.040 |       | 113.8 | 2.134 | 3.17 | -0.12 | 1.25 | 1.40 |

<sup>a</sup>  $\Delta E_{\text{tot}}$ : total energy difference relative to the ground state energy for a given composition; for Co(S<sub>2</sub>)  $E_{\text{tot}} = -2179.226190$  Hartree (B3LYP); for Fe(S<sub>2</sub>)  $E_{\text{tot}} = -2060.174869$  Hartree (B3LYP); zero-point and dispersion correction included. CCSD(T)  $E_{\text{tot}} = -2177.080007$  for Co(S<sub>2</sub>) and  $-2058.068628$  for Fe(S<sub>2</sub>)

**Table 4S.** Bond Lengths, Bond Angles, Magnetic Moments on Atoms ( $\mu$ , Bohr Magnetons), Spin Contamination Expectation Value  $\langle S^2 \rangle$  and Energies for Neutral  $(\text{CoS})_2$  and for the Persulfo-isomers  $\text{Co}_2(\text{S}_2)$ .

| Cluster Model                   | State             | $R_{\text{Co-S}}$<br>Å | $R_{\text{S-S}}$<br>Å | $R_{\text{Co-Co}}$<br>Å | $\angle \text{SCoS},$<br>$\angle \text{CoSS}^a$<br>deg | Dihedral<br>$\angle \text{SCoSCo}$<br>deg | $\mu_{\text{Co}}$ | $\mu_{\text{S}}$ | $\langle S^2 \rangle$ | $\Delta E_{\text{tot, eV}}$<br>B3LYP | $\Delta E_{\text{tot, eV}}$<br>CCSD(T) |
|---------------------------------|-------------------|------------------------|-----------------------|-------------------------|--------------------------------------------------------|-------------------------------------------|-------------------|------------------|-----------------------|--------------------------------------|----------------------------------------|
| $\text{Co}_2\text{S}_2, D_{2h}$ | $^1\text{A}$      | 2.183                  | 3.655                 | 2.388                   | 113.7                                                  |                                           | 2.46<br>-2.46     | 0.00<br>0.00     |                       | 0                                    | 0                                      |
|                                 | $^7\text{A}_u$    | 2.181                  | 3.652                 | 2.385                   | 113.6                                                  |                                           | 2.36              | 0.64             | 12.048                | 0.54                                 | 0.41                                   |
|                                 | $^5\text{B}_{2u}$ | 2.120                  | 3.549                 | 2.319                   | 113.7                                                  |                                           | 1.91              | 0.09             | 6.147                 | 1.88                                 | 1.51                                   |
|                                 | $^3\text{B}_{3u}$ | 2.047                  | 3.385                 | 2.303                   | 111.5                                                  |                                           | 1.09              | -0.09            | 2.066                 | 2.42                                 | 2.44                                   |
|                                 | $^1\text{A}_g$    | 2.026                  | 3.355                 | 2.271                   | 111.8                                                  |                                           | 0.00              | 0.00             |                       | 2.82                                 | 2.71                                   |
| $\text{Co}_2\text{S}_2, C_{2v}$ | $^3\text{A}_2$    | 2.105                  | 3.153                 | 2.496                   | 97.0                                                   | 33.7                                      | 0.86              | 0.14             | 2.118                 | 2.95                                 | 2.81                                   |
|                                 | $^7\text{A}_1$    | 2.260                  | 2.302                 | 3.508                   | 61.2                                                   | 43.2                                      | 2.80              | 0.20             | 12.102                | 3.01                                 | 2.88                                   |
|                                 | $^1\text{A}_1$    | 2.151                  | 2.106                 | 2.735                   | 58.6                                                   | 62.5                                      | 0.00              | 0.00             |                       | 4.62                                 | 4.31                                   |
| $\text{Co}_2(\text{S}_2)$       | $^5\text{A}_2$    | 2.130                  | 2.169                 | 2.330                   | 92.2                                                   |                                           | 1.87              | 0.13             | 6.105                 | 2.48                                 | 2.57                                   |
|                                 | $^7\text{B}_1$    | 2.210                  | 2.096                 | 2.142                   | 90.6                                                   |                                           | 2.62              | 0.38             | 12.055                | 2.69                                 | 2.60                                   |
|                                 | $^3\text{A}_1$    | 2.077                  | 2.102                 | 2.165                   | 90.9                                                   |                                           | 0.91              | 0.09             | 2.059                 | 3.97                                 | 3.79                                   |



|                                                           |                  |       |       |       |       |               |       |       |      |      |
|-----------------------------------------------------------|------------------|-------|-------|-------|-------|---------------|-------|-------|------|------|
|                                                           | $^1\mathbf{A}_1$ | 2.023 | 2.102 | 2.087 | 89.8  | 0.00          | 0.00  | 4.58  | n.c. |      |
| CoSSCo, $C_{2h}$                                          | $^3\mathbf{A}_u$ | 2.184 | 2.056 |       | 116.5 | 1.48          | -0.48 | 2.297 | 3.75 | 3.83 |
| Co <sub>2</sub> S <sub>2</sub> Cl <sub>2</sub> , $C_{2v}$ | $^1\mathbf{A}$   | 2.133 | 3.462 | 2.494 | 108.5 | 2.47<br>-2.47 | 0.00  |       |      |      |

<sup>a</sup> –  $\angle\text{SCoS}$  for sulfide clusters with separated sulfur atoms and for non-planar disulfide clusters;  $\angle\text{CoSS}$  for planar clusters with bridging or side-on bonded S<sub>2</sub>.  $\Delta E_{\text{tot}}$  – total energy difference relative to the ground state energy of neutral Co<sub>2</sub>S<sub>2</sub>:  $E_{\text{tot}} = -3562.050919$  Hartree for B3LYP, zero-point and dispersion correction included;  $-3558.797034$  Hartree for CCSD(T).

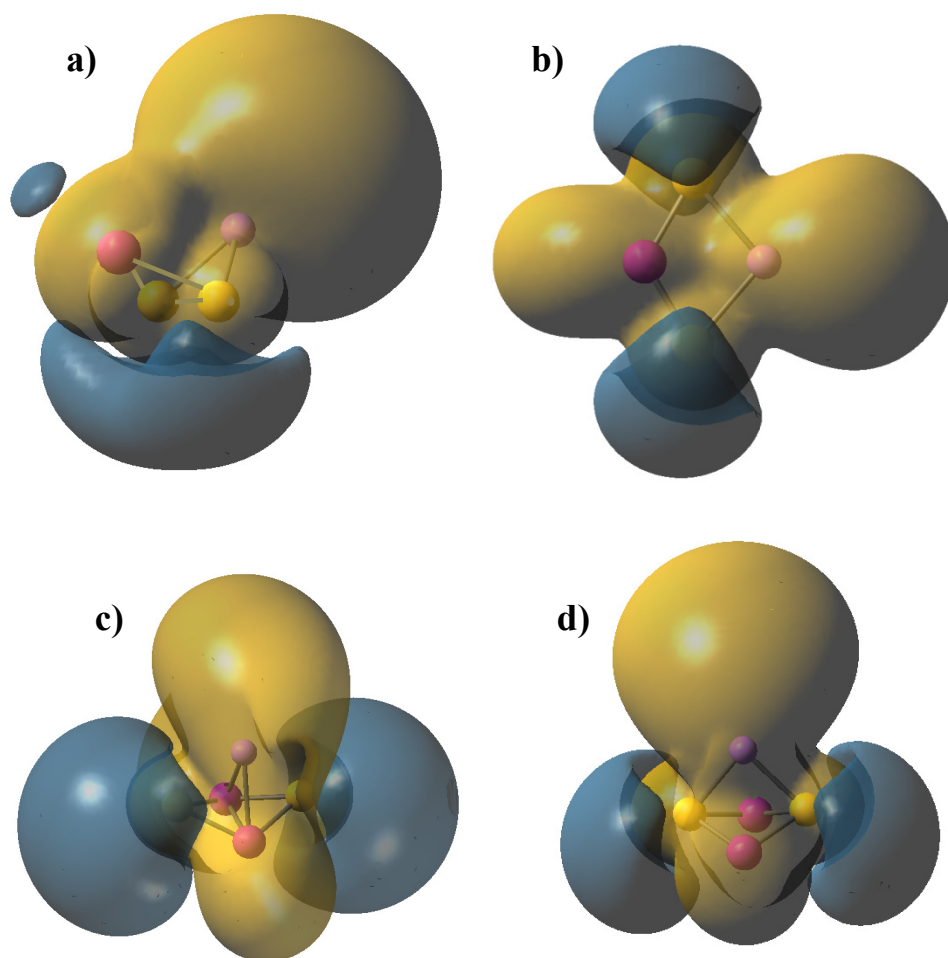

Figure 1S. Molecular electrostatic potential (MEP) map of a)  $\text{Co}(\text{S}_2)\text{-Li}^+, \text{e}^-$ ; b)  $\text{CoS}_2\text{-Li}^+, \text{e}^-$ ; and c)  $\text{Co}_2\text{S}_2\text{-Li}^+, \text{e}^-$  in  ${}^6\text{A}$  state; d)  $\text{Co}_2\text{S}_2\text{-Li}^+, \text{e}^-$  in  ${}^6\text{B}_1$  state. Sulphur atoms are yellow, cobalt – pink, lithium ions – small pink balls. Electropositive area is golden yellow, electronegative areas – dark blue. Contour lines are drawn at 0.085 a.u. for a), b) and at 0.2 a.u. for c). Colour legend as Figure 1S.

$\text{Li}^+$  binding to  $\text{Co}(\text{S}_2)$  yields a rhomboid boat-shaped cluster in which all local charges increase, Co and Li bear nearly equal charge of +0.91 and +0.94 and the charge on S becomes less negative, see Table 2S. Chloride and carbonyl ligands have minor effect on the relative stability of cation-coordinated clusters, as the cations have a dominant effect on the electron distribution: they create a strong field of positive electrostatic potential and increase Co-S and Fe-S bond polarization

**Table 5S.** Bond Lengths, Bond Angles, Magnetic Moments on Atoms<sup>a</sup> ( $\mu$ , Bohr Magnetons), for  $[M_4S_4]X_4$  clusters, with M=Fe,Co and X=CO, Cl<sup>-</sup>

| Cluster Model                                                    | $R_{M-S}$ Å              | $R_{M-X}$ Å              | $\mu_M$                            | $\mu_S$      |
|------------------------------------------------------------------|--------------------------|--------------------------|------------------------------------|--------------|
| Fe <sub>4</sub> S <sub>4</sub>                                   | 2.221                    |                          | 1.70/-1.70                         | -0.20/0.20   |
| Co <sub>4</sub> S <sub>4</sub>                                   | 2.220                    |                          | 1.47/-1.47                         | 0.03/-0.03   |
| Fe <sub>4</sub> S <sub>4</sub> Cl <sub>4</sub>                   | 2.177                    | 2.110                    | 2.11<br>-2.11                      | 0.00<br>0.00 |
| Co <sub>4</sub> S <sub>4</sub> Cl <sub>4</sub>                   | 2.182                    | 2.120                    | 2.53<br>-2.53                      | 0.24/-0.24   |
| Co <sub>2</sub> Fe <sub>2</sub> S <sub>4</sub> Cl <sub>4</sub>   | 2.140 (Co)<br>2.142 (Fe) | 2.110 (Co)<br>2.103 (Fe) | 2.12/-2.12 (Co)<br>3.16/-3.16 (Fe) | 0.00<br>0.00 |
| Fe <sub>4</sub> S <sub>4</sub> (CO) <sub>4</sub>                 | 2.250                    | 1.978                    | 3.21<br>-3.21                      | 0.00<br>0.00 |
| Co <sub>4</sub> S <sub>4</sub> (CO) <sub>4</sub>                 | 2.230                    | 1.861                    | 2.18<br>-2.18                      | 0.04/-0.04   |
| Co <sub>2</sub> Fe <sub>2</sub> S <sub>4</sub> (CO) <sub>4</sub> | 2.259 (Co)<br>2.247 (Fe) | 1.923 (Co)<br>1.998 (Fe) | 2.27/-2.27 (Co)<br>3.39/-3.39 (Fe) | 0.07/-0.07   |

<sup>a</sup> – negative sign in magnetic moment denotes antiferromagnetic coupling

**Table 6S.** Bond Lengths, Bond Angles, Magnetic Moments on Atoms ( $\mu$ , Bohr Magnetons), and Energies for disulfides  $MS_2$ ,  $M_2S_2$  and persulfides  $M(S_2)$ , bonded to  $Li^+$  cations and upon  $1e^-$  reduction

| Cluster Model                                                                                            | State                       | $R_{M-S}$ Å | $R_{S-Cat}$ Å           | $\angle S-M-S$ ,<br>deg | $\mu_M$ | $\mu_S$ | $\Delta E_{tot}$ eV <sup>a</sup><br>B3LYP |
|----------------------------------------------------------------------------------------------------------|-----------------------------|-------------|-------------------------|-------------------------|---------|---------|-------------------------------------------|
| Co(S <sub>2</sub> )-Li <sup>+</sup>                                                                      | <sup>4</sup> A'             | 2.198       | 2.377                   | 59.4                    | 2.33    | 0.33    | 0.0                                       |
| CoS <sub>2</sub> -Li <sup>+</sup>                                                                        | <sup>4</sup> B <sub>2</sub> | 2.029       | 2.421                   | 97.4                    | 2.13    | 0.41    | 0.66                                      |
|                                                                                                          | <sup>6</sup> A <sub>1</sub> | 2.129       | 2.507                   | 117.5                   | 2.58    | 1.19    | 0.86                                      |
| CoS <sub>2</sub> - Li <sup>+</sup> ,e <sup>-</sup>                                                       | <sup>5</sup> A <sub>1</sub> | 2.081       | 2.360                   | 120.3                   | 2.50    | 0.75    | 0.0                                       |
| Co(S <sub>2</sub> )-Li <sup>+</sup> ,e <sup>-</sup>                                                      | <sup>5</sup> A'             | 2.349       | 2.253                   | 54.6                    | 3.57    | 0.19    | 1.26                                      |
| Cl-Co(S <sub>2</sub> )-Li <sup>+</sup>                                                                   | <sup>4</sup> A'             | 2.269       | 2.271                   | 61.2                    | 2.50    | 0.20    | 0.0                                       |
| Cl-CoS <sub>2</sub> -Li <sup>+</sup>                                                                     | <sup>4</sup> B <sub>2</sub> | 2.056       | 2.277                   | 100.7                   | 2.18    | 0.28    | 0.74                                      |
| Co <sub>2</sub> S <sub>2</sub> -Li <sup>+</sup>                                                          | <sup>7</sup> A              | 2.223       | 2.505                   | 98.1                    | 2.53    | 0.43    |                                           |
| Co <sub>2</sub> S <sub>2</sub> - Li <sup>+</sup> ,e <sup>-</sup><br>(Li-S; Li-Co <sub>2</sub> )<br>bonds | <sup>6</sup> A              | 2.245       | 2.420 (S)<br>2.519 (Co) | 107.7                   | 2.27    | 0.23    | 0.0                                       |
| Co <sub>2</sub> S <sub>2</sub> - Li <sup>+</sup> ,e <sup>-</sup><br>(Li-S) bond                          | <sup>6</sup> B <sub>1</sub> | 2.239       | 2.306                   | 86.6                    | 2.71    | -0.23   | 2.20                                      |
| Fe(S <sub>2</sub> )-Li <sup>+</sup>                                                                      | <sup>5</sup> A'             | 2.228       | 2.369                   | 54.3                    | 3.47    | 0.26    | 0.0                                       |
| FeS <sub>2</sub> -Li <sup>+</sup>                                                                        | <sup>5</sup> B <sub>2</sub> | 2.043       | 2.426                   | 102.3                   | 3.33    | 0.31    | 0.35                                      |
|                                                                                                          | <sup>3</sup> B <sub>1</sub> | 2.061       | 2.424                   | 101.2                   | 3.10    | -0.58   | 0.70                                      |
| FeS <sub>2</sub> - Li <sup>+</sup> ,e <sup>-</sup>                                                       | <sup>6</sup> A <sub>1</sub> | 2.110       | 2.357                   | 118.8                   | 3.72    | 0.64    | 0.0                                       |
| Fe(S <sub>2</sub> )-Li <sup>+</sup> ,e <sup>-</sup>                                                      | <sup>6</sup> A'             | 2.368       | 2.257                   | 57.5                    | 4.62    | 0.17    | 1.34                                      |
| Cl-Fe(S <sub>2</sub> )-Li <sup>+</sup>                                                                   | <sup>5</sup> A'             | 2.309       | 2.268                   | 58.0                    | 3.58    | 0.16    | 0.0                                       |
| Cl-FeS <sub>2</sub> -Li <sup>+</sup>                                                                     | <sup>5</sup> B <sub>2</sub> | 2.102       | 2.281                   | 100.6                   | 3.42    | 0.18    | 0.41                                      |
| Fe <sub>2</sub> S <sub>2</sub> -Li <sup>+</sup>                                                          | <sup>7</sup> A              | 2.197       | 2.502                   | 100.4                   | 3.12    | -0.12   |                                           |
| Fe <sub>2</sub> S <sub>2</sub> -Li <sup>+</sup> ,e <sup>-</sup><br>(Li-S; Li-Fe <sub>2</sub> )<br>bond   | <sup>8</sup> A              | 2.271       | 2.442 (S)<br>2.574 (Fe) | 106.8                   | 3.30    | 0.20    | 0.0                                       |

|                                                                   |                |       |       |       |      |       |      |
|-------------------------------------------------------------------|----------------|-------|-------|-------|------|-------|------|
| Fe <sub>2</sub> S <sub>2</sub> -Li <sup>+</sup> ,e<br>(Li-S) bond | <sup>6</sup> A | 2.207 | 2.390 | 100.5 | 2.69 | -0.16 | 0.91 |
|-------------------------------------------------------------------|----------------|-------|-------|-------|------|-------|------|

---

<sup>a</sup>  $-\Delta E_{\text{tot}}$  – total energy difference relative to the ground state energy, zero-point and dispersion corrections included.

**Table 7S.** Bond Lengths, Bond Angles, Magnetic Moments on Atoms ( $\mu$ , Bohr Magnetons), and Energies for disulfides  $MS_2$ ,  $M_2S_2$  and persulfides  $M(S_2)$ ,  $M_2(S_2)$  bonded to  $Na^+$  and upon  $1e^-$  reduction

| Cluster Model      | State   | $R_{M-S}$ Å | $R_{S-Cat}$ Å                  | $\angle S-M-S$ ,<br>deg | $\mu_M$ | $\mu_S$ | $\Delta E_{tot}$ , eV<br>B3LYP |
|--------------------|---------|-------------|--------------------------------|-------------------------|---------|---------|--------------------------------|
| $Co(S_2)-Na^+$     | $^4A'$  | 2.181       | 2.778                          | 57.9                    | 2.28    | 0.35    | 0.0                            |
| $CoS_2-Na^+$       | $^4B_2$ | 2.012       | 2.831                          | 102.4                   | 2.10    | 0.43    | 0.64                           |
| $CoS_2-Na^+,e^-$   | $^5A_1$ | 2.081       | $\frac{2.727}{2.876}$<br>Co-Na | 128.9                   | 2.51    | 0.75    | 0.0                            |
| $Co(S_2)-Na^+,e^-$ | $^5A'$  | 2.304       | 2.650                          | 55.4                    | 3.51    | 0.21    | 1.32                           |
| $Co_2S_2-Na^+$     | $^7A$   | 2.231       | 2.903                          | 101.7                   | 2.53    | 0.45    | 0.0                            |
| $Co_2(S_2)-Na^+$   | $^7A_1$ | 2.324       | 2.804                          | 65.3                    | 2.80    | 0.16    | 2.63                           |
| $Co_2S_2-Na^+,e^-$ | $^6A$   | 2.241       | 2.805                          | 111.5                   | 2.27    | 0.24    |                                |
| $Fe(S_2)-Na^+$     | $^5A'$  | 2.212       | 2.760                          | 59.8                    | 3.45    | 0.27    | 0.0                            |
| $FeS_2-Na^+$       | $^5B_2$ | 2.037       | 2.828                          | 105.6                   | 3.33    | 0.31    | 0.30                           |
| $FeS_2-Na^+,e^-$   | $^6A_1$ | 2.111       | $\frac{2.722}{2.913}$<br>Fe-Na | 126.5                   | 3.72    | 0.64    | 0.0                            |
| $Fe(S_2)-Na^+,e^-$ | $^6A'$  | 2.340       | 2.652                          | 57.1                    | 4.56    | 0.19    | 1.38                           |
| $Fe_2S_2-Na^+$     | $^7A_2$ | 2.219       | 2.817                          | 103.2                   | 3.14    | -0.14   |                                |
| $Fe_2S_2-Na^+,e^-$ | $^8B_2$ | 2.299       | 2.736                          | 100.4                   | 3.28    | 0.23    | 0.0                            |
| $Fe_2S_2-Na^+,e^-$ | $^6A_1$ | 2.196       | 2.735                          | 99.1                    | 2.52    | 0.00    | 1.36                           |

<sup>a</sup>  $-\Delta E_{tot}$  – total energy difference relative to the ground state energy.

Table 8S. Adsorption energies  $E$  ( $\text{kJ mol}^{-1}$ ) of  $\text{N}_2$  and  $\text{O}_2$  at alkali cations in  $\text{FeS}_2$  and  $\text{Fe}_2\text{S}_2$

| Cluster                                         | $E(\text{N}_2)$ | $E(\text{O}_2)$ |
|-------------------------------------------------|-----------------|-----------------|
| $\text{Fe}_2\text{S}_2\text{-Li}^+$             | 14.9            | 9.1             |
| $\text{Fe}_2\text{S}_2\text{-Li}^+, \text{e}^-$ | 10.8            | 6.3             |
| $\text{FeS}_2\text{-Li}^+$                      | 40.1            | 25.3            |
| $\text{FeS}_2\text{-Li}^+, \text{e}^-$          | 23.8            | 12.2            |
| $\text{FeS}_2\text{-Na}^+$                      | 24.1            | 17.2            |
| $\text{FeS}_2\text{-Na}^+, \text{e}^-$          | 15.4            | 11.3            |

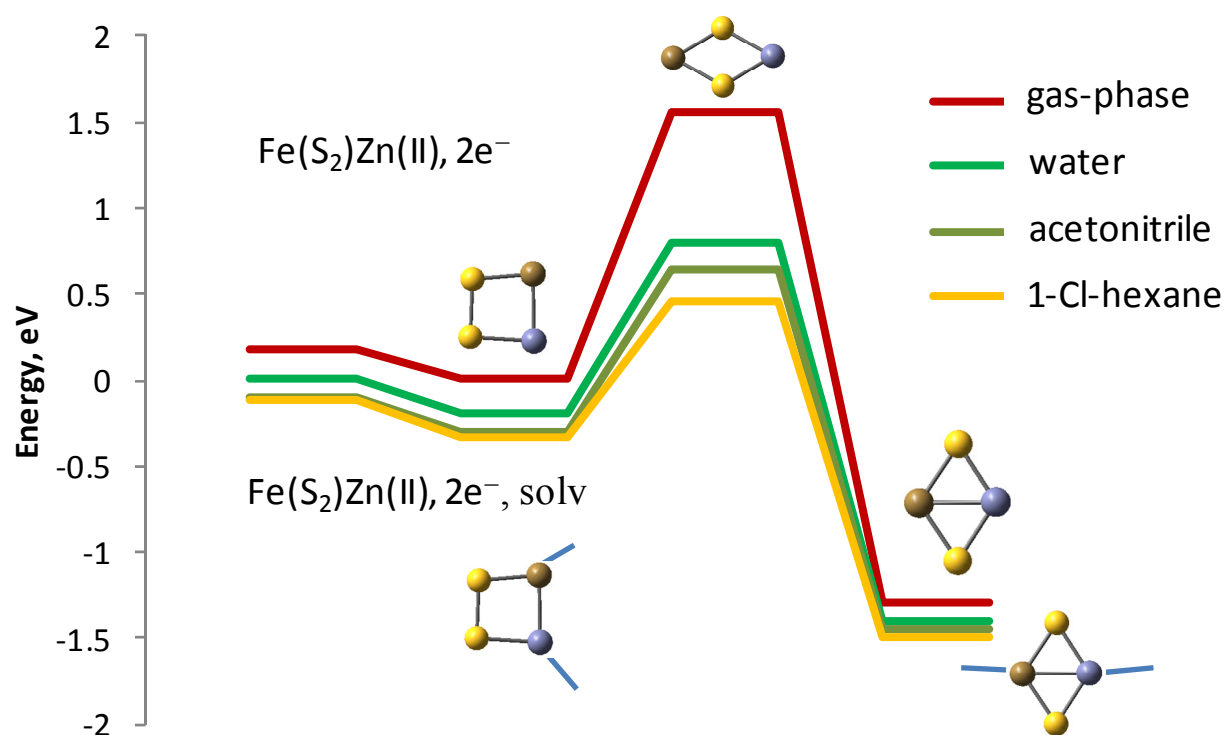

Figure 2S IRC Reaction path following of persulphide to disulphide isomerisation in reduced clusters  $\text{Fe}(\text{S}_2)\text{-Zn}(\text{II}), 2\text{e}^-$ . Acetonitrile and water molecule coordination to the clusters is denoted by blue lines.
